# Supplementary material for: Deciphering OPDA Signaling Components in the Momilactone-Producing Moss Calohypnum plumiforme
Source: Frontiers journal article supplement (doi:10.3389/fpls.2021.688565), 2021-05-31
Supplement: Image_1.PDF [file Image_1.PDF]

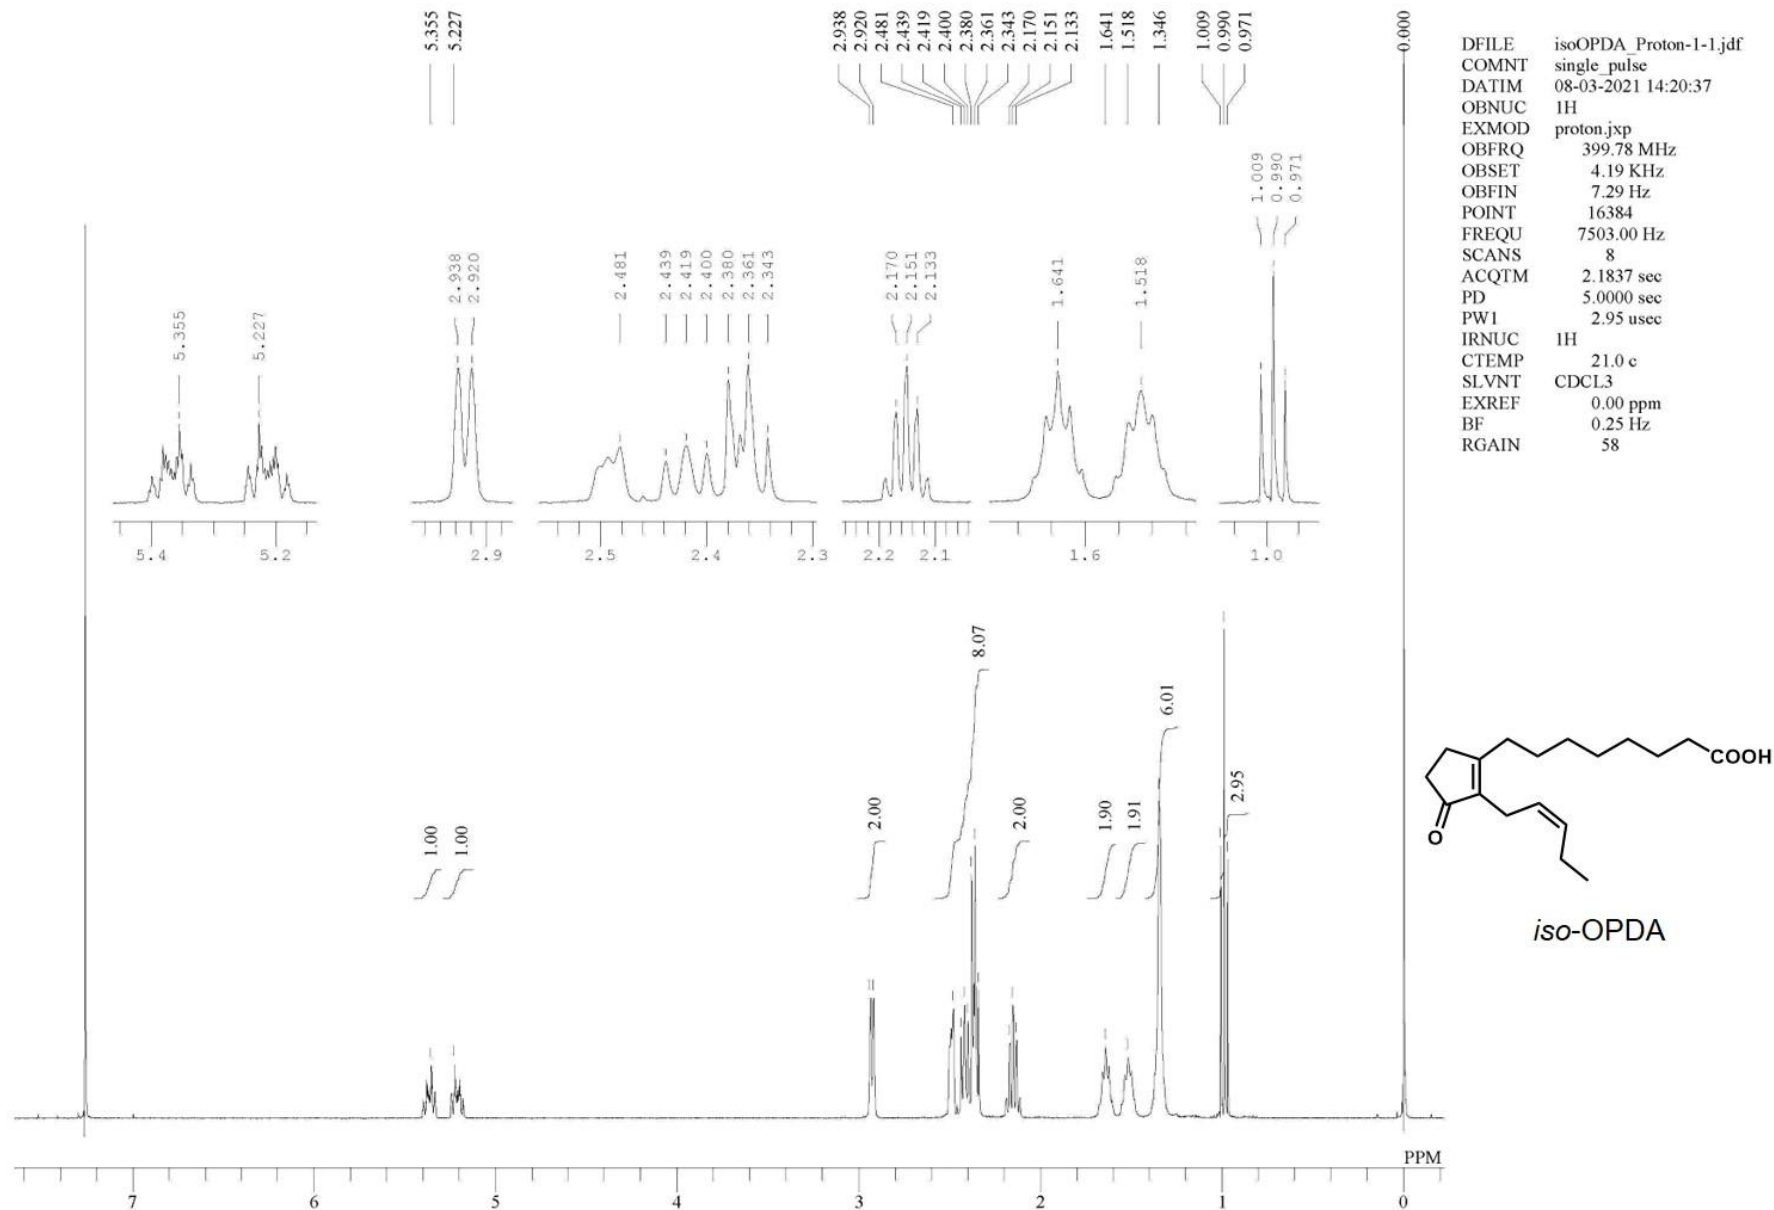

### Supplementary Figure 1. <sup>1</sup>H NMR spectrum of *iso*-OPDA

<sup>1</sup>H NMR spectrum was recorded on a JNM-ECS-400 spectrometer in deuterated chloroform using TMS as an internal standard.
