# Supplementary material for: Deciphering OPDA Signaling Components in the Momilactone-Producing Moss Calohypnum plumiforme
Source: Frontiers journal article supplement (doi:10.3389/fpls.2021.688565), 2021-05-31
Supplement: Image_2.PDF [file Image_2.PDF]

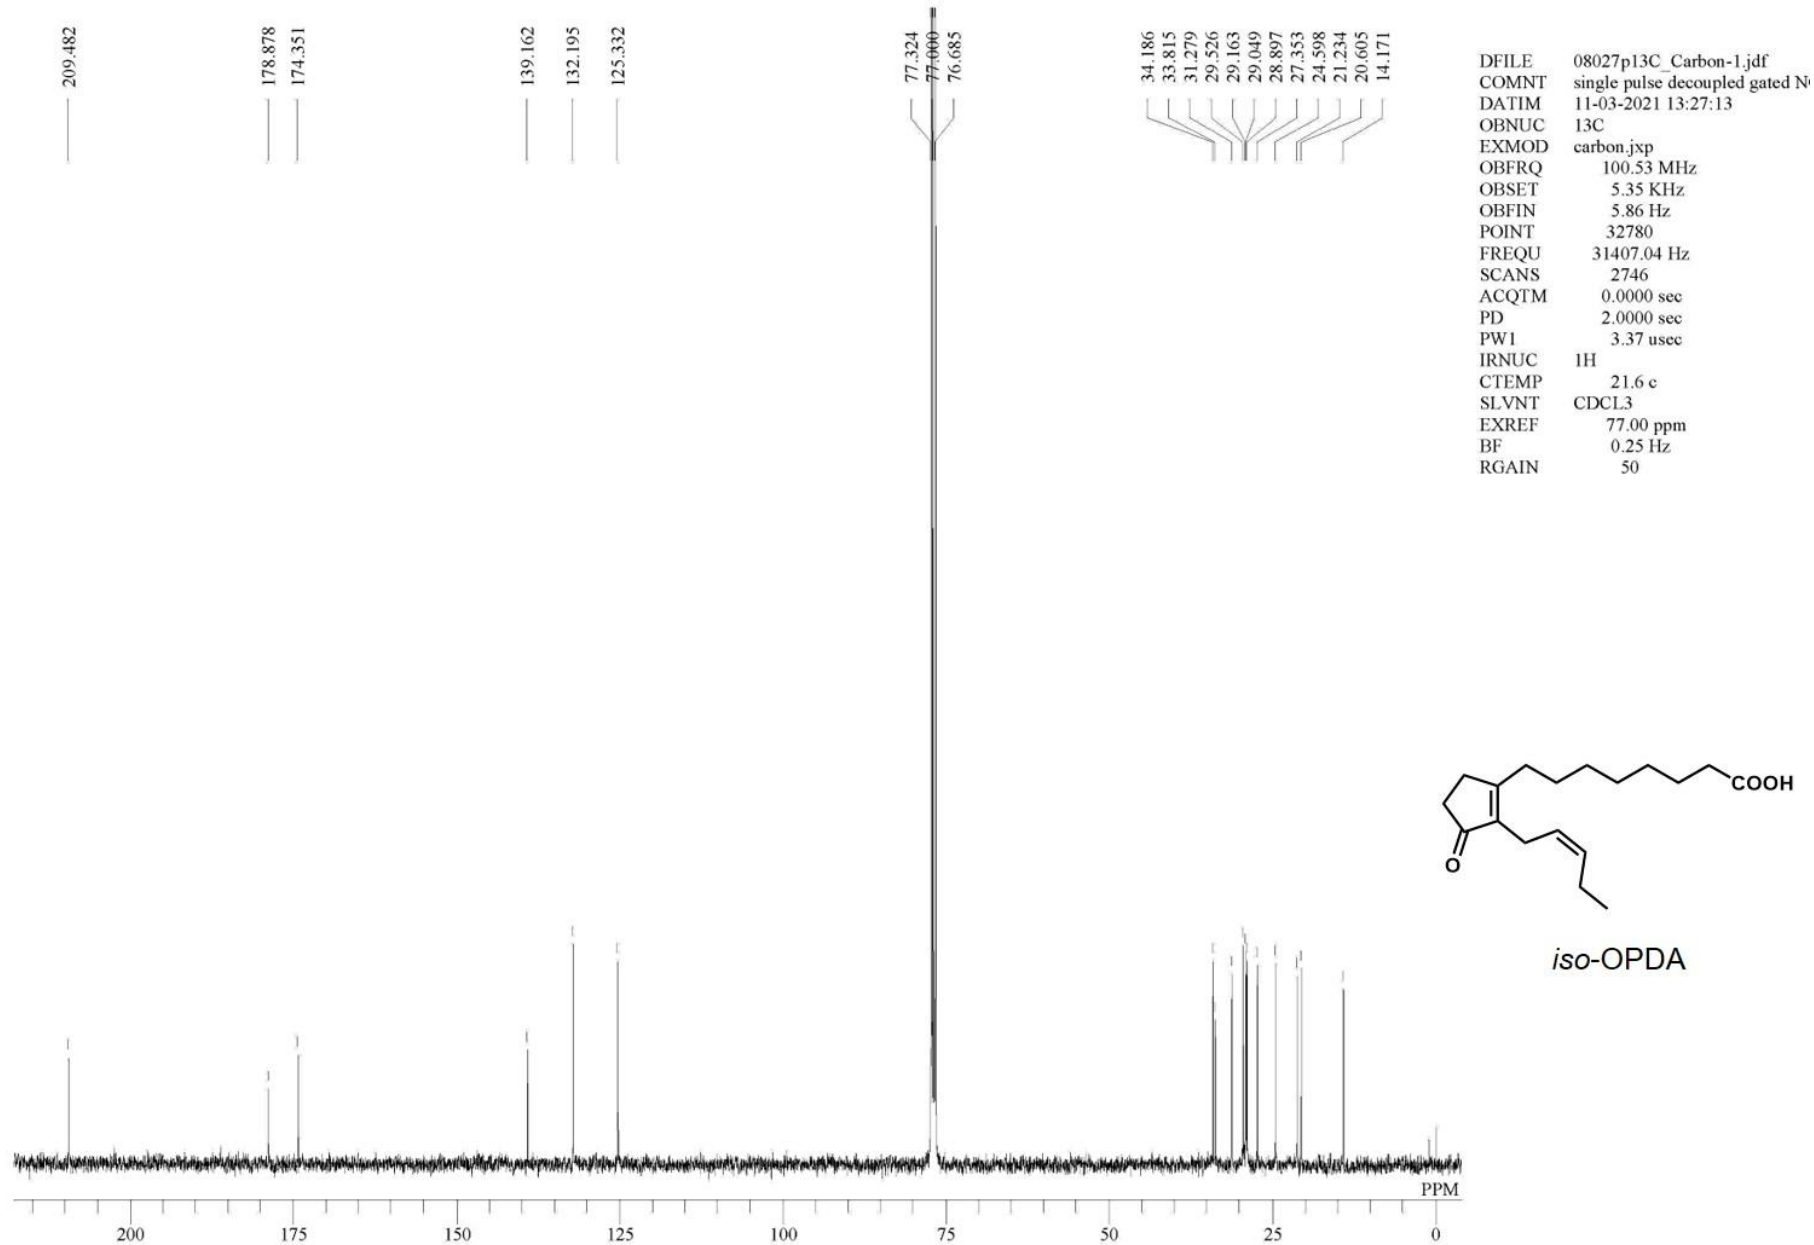

### Supplementary Figure 2. <sup>13</sup>C NMR spectrum of *iso*-OPDA

<sup>13</sup>C NMR spectrum was recorded on a JNM-ECS-400 spectrometer in deuterated chloroform using TMS as an internal standard.
