# Supplementary material for: Deciphering OPDA Signaling Components in the Momilactone-Producing Moss Calohypnum plumiforme
Source: Frontiers journal article supplement (doi:10.3389/fpls.2021.688565), 2021-05-31
Supplement: Image_6.PDF [file Image_6.PDF]

(A)

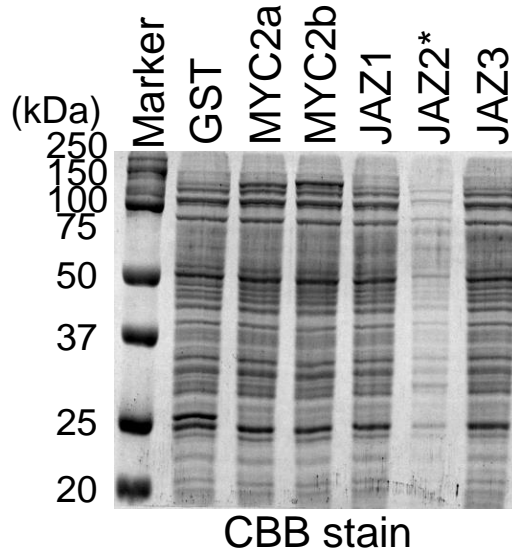

(B)

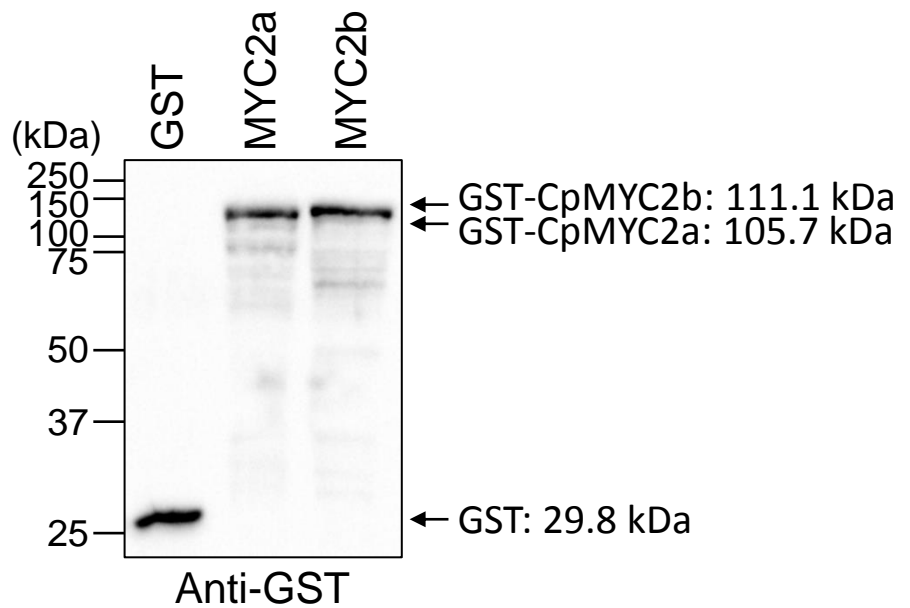

(C)

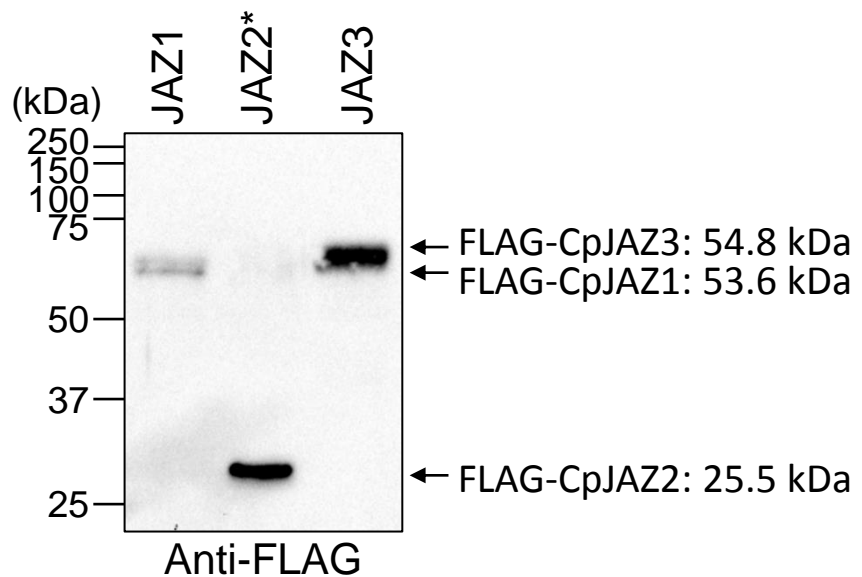

Supplementary Figure 6. Expression of GST-CpMYC2s and FLAG-JAZs.

(A) *In vitro* expressed proteins were subjected to SDS-PAGE and stained by CBB.

(B) *In vitro* expressed proteins were subjected to protein gel blot analyses and detected by anti-GST antibodies.

(C) *In vitro* expressed proteins were subjected to protein gel blot analyses and detected by anti-FLAG antibodies.

Marker: Precision Plus Protein Dual Color Standards (BioRad), \*: the JAZ2 protein was diluted 5 times due to its high expression.
